# Supplementary material for: Construction of core–shell CoSe2/ZnIn2S4 heterostructures for efficient visible-light-driven photocatalytic hydrogen evolution
Source: Royal Society of Chemistry journal article supplement (doi:10.1039/d3dt03379a), 2023-11-24
Supplement: d3dt03379a1.pdf [file d3dt03379a1.pdf]

## Supporting Information:

### Construction of Core-Shell CoSe<sub>2</sub>/ZnIn<sub>2</sub>S<sub>4</sub> Heterostructures for Efficient Visible-Light-Driven Photocatalytic Hydrogen Evolution

Yuhan Xie<sup>a</sup>, Boyu Dong<sup>a</sup>, Xuemin Wang<sup>a</sup>, Siyuan Wang<sup>b</sup>, Jinxi Chen<sup>a</sup> and Yongbing Lou<sup>a\*</sup>

<sup>a</sup> *School of Chemistry and Chemical Engineering, Southeast University, Nanjing, 211189, P. R. China.*

<sup>b</sup> *Nanjing Foreign Language School, Nanjing, 210008, China.*

#### Materials

Cobalt chloride hexahydrate (CoCl<sub>2</sub>·6H<sub>2</sub>O, ≥ 99%), chloroplatinic acid hexahydrate (H<sub>2</sub>PtCl<sub>6</sub>·6H<sub>2</sub>O, ≥ 99%), zinc chloride (ZnCl<sub>2</sub>, ≥ 98%), ethylenediamine (≥ 99%), triethanolamine (TEOA, ≥ 99%), and anhydrous ethanol (≥ 98%) and ethylene glycol (≥ 99.5%) were purchased from Sinopharm Chemical Reagent Co. Ltd. (China). Indium chloride tetrahydrate (InCl<sub>3</sub>·4H<sub>2</sub>O, ≥ 99%) and selenium dioxide (SeO<sub>2</sub>, ≥ 99%) were obtained from Shanghai Macklin Biochemical Technology Co. Ltd. Thioacetamide (TAA, ≥ 98%) was purchased from Aladdin Industrial Corporation. The above materials were used directly without further purification.

#### Characterizations

The composition of the synthesized catalysts was determined by using X-ray diffraction (XRD) with incident radiation Cu Kα (λ = 0.15406 nm) in the range of 10° - 80° at a scan speed of 15°/min. UV-vis spectrometer (UV2700) was used to observe the diffuse reflectance spectra of monomers and compounds with BaSO<sub>4</sub> as a reference. The morphology of the samples was characterized by scanning electron microscope

(SEM, FEI Inspect F50). Transmission electron microscope (TEM) and high-resolution transmission electron microscope (HRTEM) images were obtained by FEIG220 microscope under 200 kV acceleration voltage, and energy dispersive X-ray spectroscopy (EDX) was also measured. To determine the elemental composition and the surface valence states, X-ray photoelectron spectroscopy (XPS) data were obtained by using a Thermo Scientific K-Alpha with Al K $\alpha$  radiation as the X-ray source. Photoluminescence (PL) spectra were measured by Fluoromax-Plus fluorescence spectrometers (Horiba) and time-resolved photoluminescence (TRPL) spectra were measured by FLS1000 fluorescence spectrometer (Edinburgh).

### **Photoelectrochemical measurements**

The photoelectrochemical properties were tested on the CHI660E electrochemical workstation by a standard three-electrode system, including an Ag/AgCl (3 M KCl) electrode, a platinum plate electrode, and a working electrode. The electrolyte was 0.5 M Na<sub>2</sub>SO<sub>4</sub> aqueous solution. The electrical impedance spectroscopy (EIS), transient photocurrent, and the Mott-Schottky plots of the materials were characterized. The working electrode was prepared as follows. A small spoon of sample and a drop of terpineol were added into a mortar. It was ground into a paste and evenly smeared to the square area in the center of the conductive surface of the ITO conductive glass (the coating size is 5×5 mm). Then it was dried at 60 °C for 6 h. In the transient photocurrent test, the light source was still a 300 W xenon lamp with a UV-CUT filter ( $\lambda \geq 420$  nm).

## Additional Data

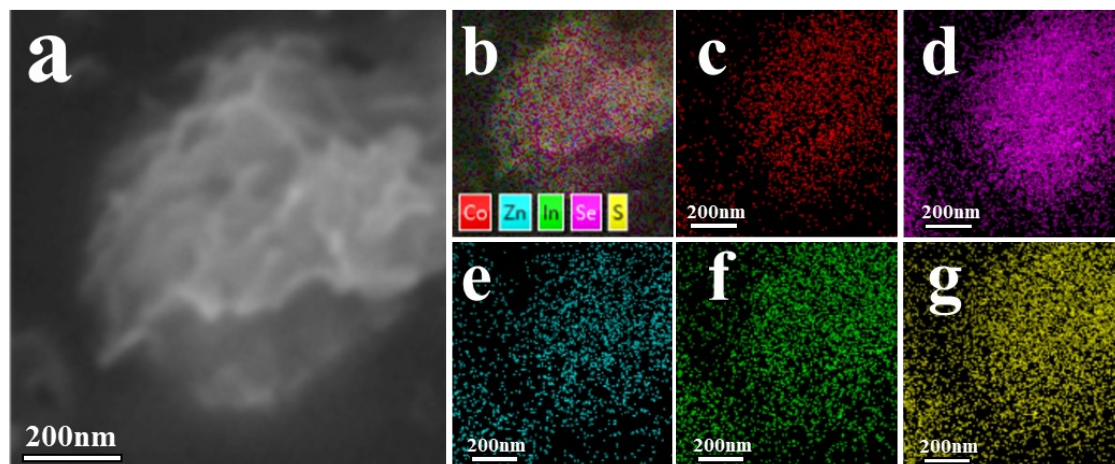

**Fig. S1** SEM image of (a)  $\text{CoSe}_2/\text{ZnIn}_2\text{S}_4$ -20 core-shell heterostructure and (b) the corresponding EDS and elemental mapping images of (c) Co, (d) Se, (e) Zn, (f) In, and (g) S.

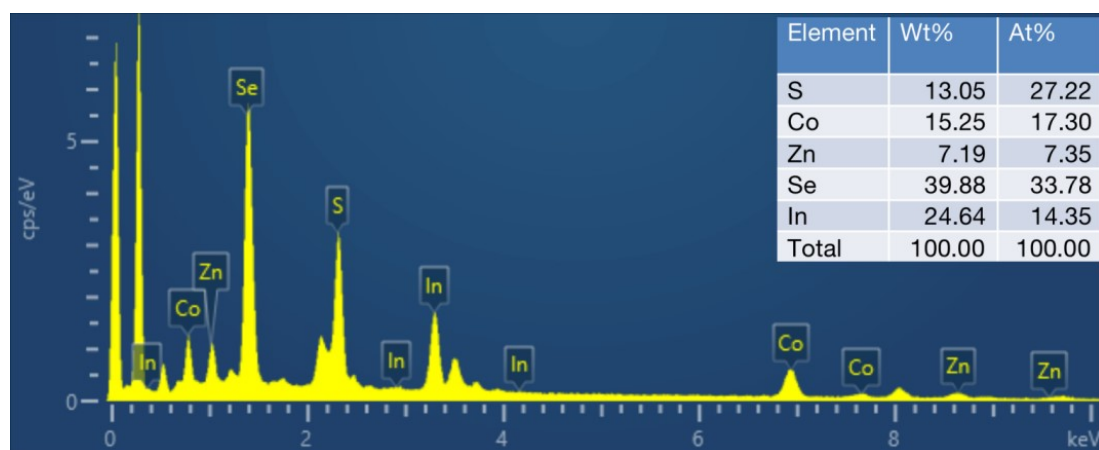

**Fig. S2** EDS element analysis of  $\text{CoSe}_2/\text{ZnIn}_2\text{S}_4$ -20.

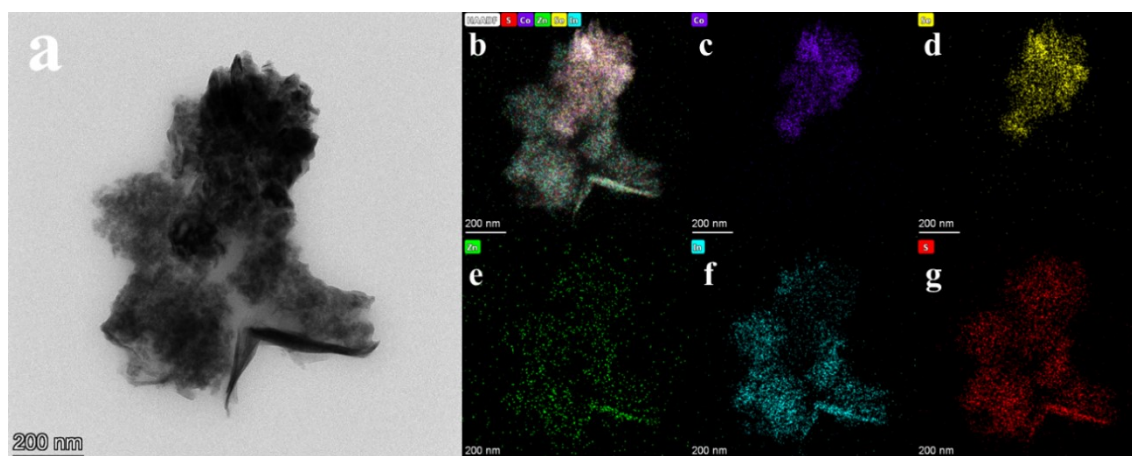

**Fig. S3** TEM image of (a)  $\text{CoSe}_2@\text{ZnIn}_2\text{S}_4$  physical mixture heterostructure and (b) the corresponding EDS and elemental mapping images of (c) Co, (d) Se, (e) Zn, (f) In, and (g) S.

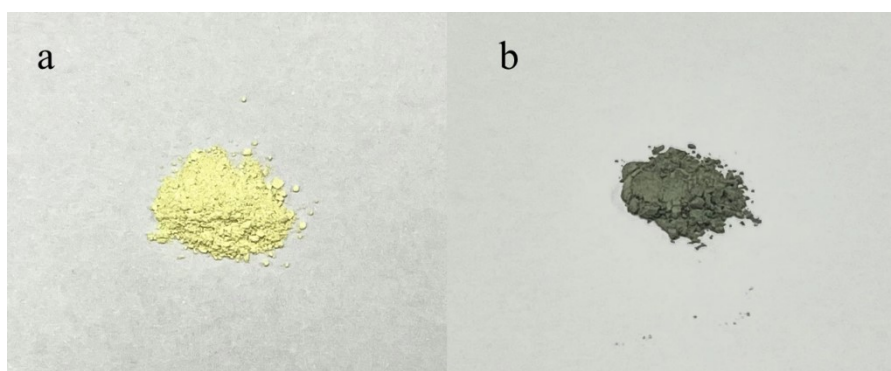

**Fig. S4** the pictures of (a)  $\text{ZnIn}_2\text{S}_4$  and (b)  $\text{CoSe}_2/\text{ZnIn}_2\text{S}_4\text{-20}$  sample.

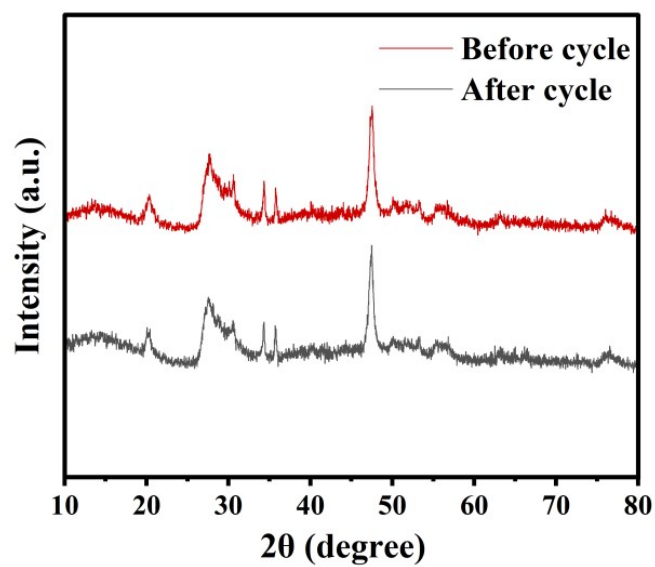

**Fig. S5** XRD patterns comparison of CoSe<sub>2</sub>/ZnIn<sub>2</sub>S<sub>4</sub>-20 before and after cycle.

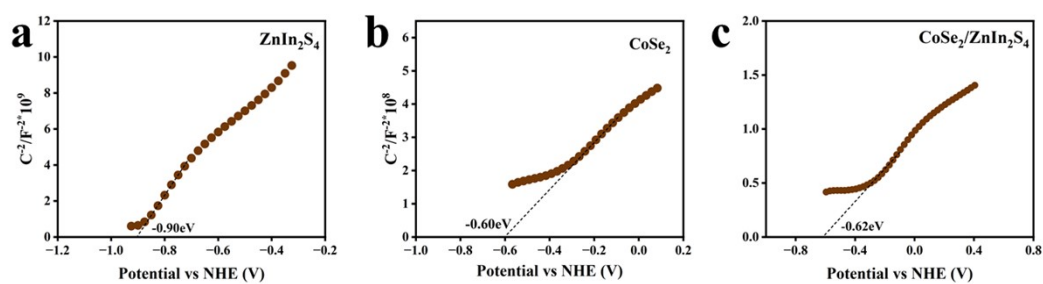

**Fig. S6** Mott-Schottky plots of (a) ZnIn<sub>2</sub>S<sub>4</sub>, (b) CoSe<sub>2</sub> and (c) CoSe<sub>2</sub>/ZnIn<sub>2</sub>S<sub>4</sub>-20.

**Table S1** Comparison of photocatalytic H<sub>2</sub> evolution performance for different photocatalysts.

| Photocatalysts                                                        | Sacrificial agent                                                   | Light source               | H <sub>2</sub> evolution rate (μmol g <sup>-1</sup> h <sup>-1</sup> ) | Ref.      |
|-----------------------------------------------------------------------|---------------------------------------------------------------------|----------------------------|-----------------------------------------------------------------------|-----------|
| CoSe <sub>2</sub> /ZnIn <sub>2</sub> S <sub>4</sub>                   | TEOA (10 vol%)                                                      | 300 W Xe lamp (λ ≥ 420 nm) | 2199 μmol g <sup>-1</sup> h <sup>-1</sup>                             | this work |
| ZnIn <sub>2</sub> S <sub>4</sub> /ZnSe                                | 0.25 M Na <sub>2</sub> S and 0.35 M Na <sub>2</sub> SO <sub>3</sub> | 300 W Xe lamp (λ ≥ 420 nm) | 1296.9 μmol g <sup>-1</sup> h <sup>-1</sup>                           | 1         |
| ZnIn <sub>2</sub> S <sub>4</sub> /MoSe <sub>2</sub>                   | 0.35 M Na <sub>2</sub> S and 0.25 M Na <sub>2</sub> SO <sub>3</sub> | 300 W Xe lamp (λ ≥ 420 nm) | 2228 μmol g <sup>-1</sup> h <sup>-1</sup>                             | 2         |
| NiSe <sub>2</sub> /ZnIn <sub>2</sub> S <sub>4</sub>                   | TEOA (10 vol%)                                                      | visible light (λ ≥ 420 nm) | 1487 μmol g <sup>-1</sup> h <sup>-1</sup>                             | 3         |
| MoSe <sub>2</sub> /ZnIn <sub>2</sub> S <sub>4</sub>                   | 0.35 M Na <sub>2</sub> S and 0.25 M Na <sub>2</sub> SO <sub>3</sub> | 300 W Xe lamp (λ ≥ 420 nm) | 1226 μmol g <sup>-1</sup> h <sup>-1</sup>                             | 4         |
| Co <sub>3</sub> O <sub>4</sub> /ZnIn <sub>2</sub> S <sub>4</sub>      | TEOA                                                                | 300 W Xe lamp (λ ≥ 420 nm) | 3844.12 μmol g <sup>-1</sup> h <sup>-1</sup>                          | 5         |
| ZnIn <sub>2</sub> S <sub>4</sub> @CoS <sub>2</sub>                    | TEOA                                                                | 300 W Xe lamp (λ ≥ 350 nm) | 2768 μmol g <sup>-1</sup> h <sup>-1</sup>                             | 6         |
| Co <sub>9</sub> S <sub>8</sub> @ZnIn <sub>2</sub> S <sub>4</sub> /CdS | Acetonitrile, sodium sulfite                                        | 300 W Xe lamp (λ ≥ 420 nm) | 1419.14 μmol g <sup>-1</sup> h <sup>-1</sup>                          | 7         |
| Sb <sub>2</sub> S <sub>3</sub> /ZnIn <sub>2</sub> S <sub>4</sub>      | TEOA                                                                | 250 W Xe lamp (λ ≥ 420 nm) | 1685.14 μmol g <sup>-1</sup> h <sup>-1</sup>                          | 8         |
| ZnIn <sub>2</sub> S <sub>4</sub> /WS <sub>2</sub>                     | 0.35 M Na <sub>2</sub> S and 0.25 M Na <sub>2</sub> SO <sub>3</sub> | 150 W Xe lamp              | 293.3 μmol g <sup>-1</sup> h <sup>-1</sup>                            | 9         |
| CoSe <sub>2</sub> /g-C <sub>3</sub> N <sub>4</sub>                    | 0.15 M Na <sub>2</sub> S and 0.35 M Na <sub>2</sub> SO <sub>3</sub> | 300 W Xe lamp              | 1386.8 μmol g <sup>-1</sup> h <sup>-1</sup>                           | 10        |

**Table S2** Comparison of the fluorescence decay time (τ) and the average lifetime (τ<sub>ave</sub>) of the ZnIn<sub>2</sub>S<sub>4</sub> and CoSe<sub>2</sub>/ZnIn<sub>2</sub>S<sub>4</sub>-20 samples.

| Materials                                               | τ <sub>1</sub> (ns) | B <sub>1</sub> (%) | τ <sub>2</sub> (ns) | B <sub>2</sub> (%) | τ <sub>ave</sub> (ns) |
|---------------------------------------------------------|---------------------|--------------------|---------------------|--------------------|-----------------------|
| ZnIn <sub>2</sub> S <sub>4</sub>                        | 1.28                | 69.9               | 8.6                 | 30.1               | 3.48                  |
| CoSe <sub>2</sub> /ZnIn <sub>2</sub> S <sub>4</sub> -20 | 1.09                | 62.6               | 6.09                | 37.4               | 2.96                  |

## References

1. Y. Zhong, M. Li, X. Luan, F. Gao, H. Wu, J. Zi and Z. Lian, *Appl. Catal. B: Environ.*, 2023, **335**, 122859.
2. D. Zeng, L. Xiao, W. J. Ong, P. Wu, H. Zheng, Y. Chen and D. L. Peng, *ChemSusChem*, 2017, **10**, 4624-4631.
3. L. Lai, F. Xing, C. Cheng and C. Huang, *Adv. Mater. Interfaces*, 2021, **8**,

2100052.

4. T. Feng, K. Zhao, H. Li, W. Wang, B. Dong and L. Cao, *CrystEngComm*, 2021, **23**, 2547-2555.
5. Y. Zhang, D. Chen, N. Li, Q. Xu, H. Li and J. Lu, *Appl. Surf. Sci.*, 2023, **610**, 155272.
6. X. Xi, Q. Dang, G. Wang, W. Chen and L. Tang, *New J. Chem.*, 2021, **45**, 20289-20295.
7. Y. Zhang, Y. Wu, L. Wan, H. Ding, H. Li, X. Wang and W. Zhang, *Appl. Catal. B: Environ.*, 2022, **311**, 121255.
8. Y. Xiao, H. Wang, Y. Jiang, W. Zhang, J. Zhang, X. Wu, Z. Liu and W. Deng, *J. Colloid Interface Sci.*, 2022, **623**, 109-123.
9. W. Pudkon, S. Kaowphong, S. Pattison, P. J. Miedziak, H. Bahruji, T. E. Davies, D. J. Morgan and G. J. Hutchings, *Catal. Sci. Technol.*, 2019, **9**, 5698-5711.
10. J. Jia, T. Zhang, K. Li, J. Zhang, J. Wan and Y. Zhang, *Inter. J. Hydrogen Energy*, 2023, **48**, 3901-3915.
